# Supplementary material
Source: Springer Nature journal article supplement (https://www.springermedizin.de/resource/supplementary/40164_2012_14_MOESM1_ESM.pdf/9686998)
Supplement: MOESM1 [file 9686998]

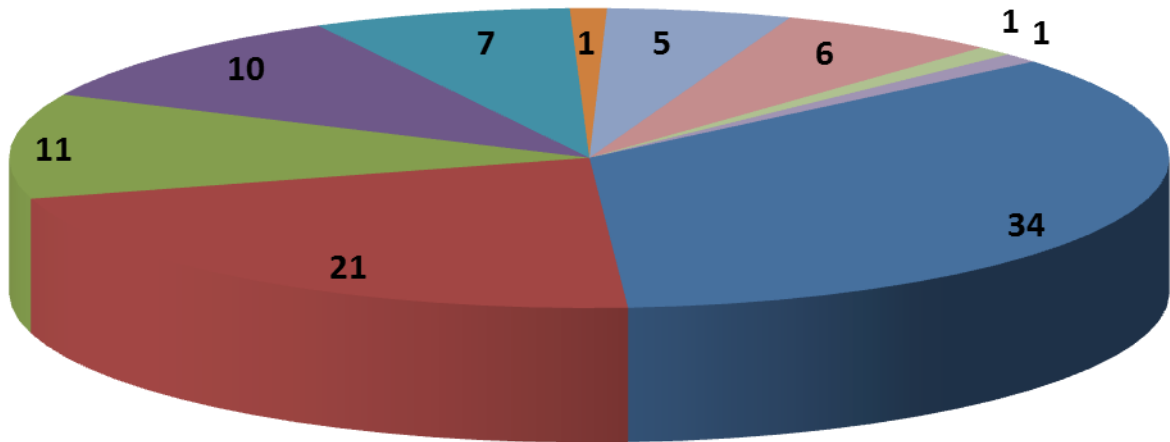

■ Aplastic Anaemia

■ Thalassemia Major

■ Chronic Myeloid Leukemia

■ Acute Myeloid Leukemia

■ Acute Lymphoblastic Leukemia

■ Biphentotypic Leukemia

■ Fanconi's Anaemia

■ Myelodysplasia

■ Osteopetrosis

■ HLH
